# Supplementary material for: Geschlechtsidentitäten bedingungslos respektieren
Source: Springer Nature journal article supplement (doi:10.1007/s00058-023-3121-0), 2023-07-01
Supplement: MOESM1 [file 25566522]

# Literatur

## zum Beitrag „Geschlechtsidentitäten bedingungslos respektieren“ von Jasmin Faulstich

*Heilberufe (75) 7-8/2023, S. 16-18*

Arnold A (2007) Biologische Grundlagen von Geschlechterunterschieden. In: S. Lautenbacher, O. Güntürkün et al. Gehirn und Geschlecht. Neurowissenschaft des kleinen Unterschieds zwischen Frau und Mann. Springer Verlag, Wiesbaden. S. 20-38

Bundesvereinigung Trans\* (BVT\*) (2017) Policy Paper Beratung der Bundesvereinigung Trans\* (BVT\*) Policy PaPer Beratung der Bundesvereinigung trans\* (Bvt\*). Trans\* Beratung. Zum Reformbedarf der Beratung in Bezug auf trans\*<sup>n</sup>. o.V., Berlin  
<https://www.bundesverband-trans.de/wp-content/uploads/2021/09/BVT-Policy-Paper-Beratung2.pdf> (letzter Zugriff: 25.03.2022)

Degele N (2008) Gender/Queer Studies. Wilhelm Fink GmbH & Co. Verlags-KG, Paderborn

Dilling H, Mombour W et al. (Hrsg.) (2011) Internationale Klassifikation psychischer Störungen. ICD-10 Kapitel V (F). Klinisch-diagnostische Leitlinien. (8. Auflage) Verlag Hans Huber, Hogrefe AG, Bern

Drescher J, Cohen-Kettenis P (2012) Minding the body: Situation gender identity diagnoses in the ICD-11. International Review of Psychiatry 24(6) 568–577

Günther M (2015) Psychotherapeutische und beratende Arbeit mit Trans\* Menschen. Erfahrung, Haltung, Hoffnung. Verhaltenstherapie & psychosoziale Praxis 47(1) 113-124

Günther M, Teren K et al. (2019) Psychotherapeutische Arbeit mit Trans\* Personen. Handbuch für die Gesundheitsversorgung. Ernst Reinhard Verlag, München

Hird M (2000): Gender's nature. Intersexuality, transsexualism and the ‚sex‘/ ‚gender‘ binary. Feminist Theory 1(3) 347-364

Hyde J, Bigler R et al. (2018) The Future of Sex and Gender in Psychology: Five Challenges to the Gender Binary. American Psychologist 74 (2) 171–193

Ridgeway C, Correll S (2004) Unpacking the gender System. A Theoretical Perspective on Gender Beliefs and Social Relations. Gender & Society, 18 (4) 510-531

Schünke M, Schulte E et al. (2014) Allgemeine Anatomie und Bewegungssystem. Prometheus. Lern-Atlas der Anatomie. Georg Thieme Verlag, Stuttgart (4. Auflage)

Sperber J, Landers S et al. (2005) Access to Health Care for Transgendered Persons: Results of a Needs Assessment in Boston. International Journal of Transgenderism 8 (2-3) 75-91

Wartenpfehl B (2000) Dekonstruktion von Geschlechtsidentität – Transversale Differenzen. Eine theoretisch-systematische Grundlegung“. Leske + Budrich, Opladen

Wetterer A (2010) Konstruktion von Geschlecht: Reproduktionsweisen der Zweigeschlechtlichkeit. In: R. Becker, B. Kortendiek et al. (Hrsg.): Handbuch Frauen- und Geschlechterforschung. (3. Auflage) Springer Verlag, Wiesbaden. S. 126-136

Whittle S, Turner L et al. (2008) Transgender EuroStudy: Legal Survey and Focus on the Transgender Experience of Health Care. The European Region of the International Lesbian and Gay Association & Transgender Europe, Brüssel

WHO (o.J.) Gender incongruence. o.V. <https://icd.who.int/browse11/l-m/en#/http%3a%2f%2fid.who.int%2fid%2fentity%2f411470068> (letzter Zugriff: 25.03.2022)
